# Supplementary material
Source: HighWire-hosted journal article supplement (https://ijssurgery.com/content/8664)
Supplement: inline-supplementary-material-1 [file inline-supplementary-material-1.docx]

| **Table S1.** Results of regression analysis. | | | | |
| --- | --- | --- | --- | --- |
| Independent Variable | Dependent  Variable | Fitted Model | R2 | p-value |
| Spacer Expansion | IVA | Exponential | .99 | .007 |
| PDH | Linear | >.99 | .001 |
| ADH | Linear | .96 | .022 |
| FH | Linear | .96 | .019 |
| FA | Linear | .82 | .096 |
| ATP-LIF with Sequential ALL Release | IVA | Exponential | .98 | .001 |
| PDH | Linear | .83 | .031 |
| ADH | Linear | .98 | .001 |
| FH | Linear | .82 | .035 |
| FA | Linear | .70 | .078 |
