# Supplementary material
Source: HighWire-hosted journal article supplement (https://ijssurgery.com/content/8664)
Supplement: inline-supplementary-material-2 [file inline-supplementary-material-2.docx]

| **Table S2.** Results of One-way ANOVA with Repeated Measures and Bonferroni correction (α) for raw ROM at L3-L4 during FE, LB, and AR. | | | | | | |
| --- | --- | --- | --- | --- | --- | --- |
|  |  | ROM (p-value) | | | | |
| Motion | Construct | Intact | ATP-LIF | 1/3 ALL Release | 2/3 ALL Release | 3/3 ALL Release |
| FE | Intact |  | .017 | .021 | .093 | .103 |
| ATP-LIF | .017 |  | >.999 | >.999 | .891 |
| 1/3 ALL Release | .021 | >.999 |  | >.999 | .820 |
| 2/3 ALL Release | .093 | >.999 | >.999 |  | >.999 |
| 3/3 ALL Release | .103 | .891 | .820 | >.999 |  |
| LB | Intact |  | .016 | .010 | .009 | .012 |
| ATP-LIF | .016 |  | >.999 | >.999 | >.999 |
| 1/3 ALL Release | .010 | >.999 |  | >.999 | >.999 |
| 2/3 ALL Release | .009 | >.999 | >.999 |  | >.999 |
| 3/3 ALL Release | .012 | >.999 | >.999 | >.999 |  |
| AR | Intact |  | .005 | .006 | .015 | .013 |
| ATP-LIF | .005 |  | .566 | >.999 | >.999 |
| 1/3 ALL Release | .006 | .566 |  | >.999 | >.999 |
| 2/3 ALL Release | .015 | >.999 | >.999 |  | >.999 |
| 3/3 ALL Release | .013 | >.999 | >.999 | >.999 |  |
