# Supplementary material
Source: HighWire-hosted journal article supplement (https://ijssurgery.com/content/8664)
Supplement: inline-supplementary-material-3 [file inline-supplementary-material-3.docx]

| **Table S3.** Inter-observer reliability of radiographic parameters. | | | | | |
| --- | --- | --- | --- | --- | --- |
| Radiographic Parameter | Interclass Correlation (AVG) | | | | Difference Between Observers  (AVG ± SD) |
| Absolute Agreement | 95% CI | Consistency | 95% CI |
| IVA (ᵒ) | .46 | (.10, .76) | .85 | (.68, .94) | 1.0 ± .8 |
| PDH (mm) | .39 | (.08 .70) | .94 | (.86, .98) | 1.1 ± 1.2 |
| ADH (mm) | .20 | (.02 .49) | .86 | (.71, .95) | .6 ± .6 |
| FH (mm) | .18 | (.02, .45) | .91 | (.82, .97) | 1.5 ± 1.1 |
| FA (mm2) | .64 | (.23, .86) | .94 | (.86, .98) | 25.0 ± 21.9 |
