# Supplementary material
Source: HighWire-hosted journal article supplement (https://ijssurgery.com/content/8664)
Supplement: inline-supplementary-material-4 [file inline-supplementary-material-4.docx]

| **Table S4:** Results of One-way ANOVA with Repeated Measures and Bonferroni correction (α) for radiographic parameters at L3-L4. | | | | | | |
| --- | --- | --- | --- | --- | --- | --- |
|  |  | ROM (p-value) | | | | |
| Motion | Construct | Intact | ATP-LIF | 1/3 ALL Release | 2/3 ALL Release | 3/3 ALL Release |
| IVA | Intact |  | .141 | .167 | .031 | .001 |
| ATP-LIF | .141 |  | .291 | .039 | .001 |
| 1/3 ALL Release | .167 | .291 |  | .033 | .001 |
| 2/3 ALL Release | .031 | .039 | .033 |  | .092 |
| 3/3 ALL Release | .001 | .001 | .001 | .092 |  |
| PDH | Intact |  | .055 | .009 | .010 | .004 |
| ATP-LIF | .055 |  | .057 | .001 | <.001 |
| 1/3 ALL Release | .009 | .057 |  | .533 | .006 |
| 2/3 ALL Release | .010 | .001 | .533 |  | .006 |
| 3/3 ALL Release | .004 | .001 | .006 | .006 |  |
| ADH | Intact |  | .203 | .078 | .014 | .001 |
| ATP-LIF | .203 |  | .192 | .020 | .001 |
| 1/3 ALL Release | .078 | .192 |  | .105 | .010 |
| 2/3 ALL Release | .014 | .020 | .105 |  | .068 |
| 3/3 ALL Release | .001 | .001 | .010 | .068 |  |
| FH | Intact |  | .234 | .072 | .098 | .101 |
| ATP-LIF | .234 |  | >.999 | >.999 | .539 |
| 1/3 ALL Release | .072 | >.999 |  | >.999 | >.999 |
| 2/3 ALL Release | .098 | >.999 | >.999 |  | .241 |
| 3/3 ALL Release | .101 | .539 | >.999 | .241 |  |
| FA | Intact |  | .481 | .649 | .562 | .789 |
| ATP-LIF | .481 |  | >.999 | >.999 | >.999 |
| 1/3 ALL Release | .649 | >.999 |  | >.999 | >.999 |
| 2/3 ALL Release | .562 | >.999 | >.999 |  | >.999 |
